# Supplementary material for: Molecular Regulation of the RhoGAP GRAF3 and Its Capacity to Limit Blood Pressure In Vivo
Source: MDPI journal article supplement (doi:10.3390/cells9041042), 2020-04-22
Supplement: s1 [file s1]

*Supplemental Material*

# **Molecular regulation of the RhoGAP GRAF3 and its capacity to limit blood pressure in vivo**

**Rachel A. Dee <sup>1,†</sup>, Xue Bai <sup>1,†</sup>, Christopher P. Mack <sup>1,2</sup> and Joan M. Taylor <sup>1,2,\*</sup>**

<sup>1</sup> Department of Pathology and Laboratory Medicine, University of North Carolina at Chapel Hill, Chapel Hill, NC, 27599, USA

<sup>2</sup> McAllister Heart Institute, University of North Carolina at Chapel Hill, Chapel Hill, NC, 27599, USA

<sup>†</sup> Authors contributed equally

\* Correspondence: joan\_m\_taylor@med.unc.edu

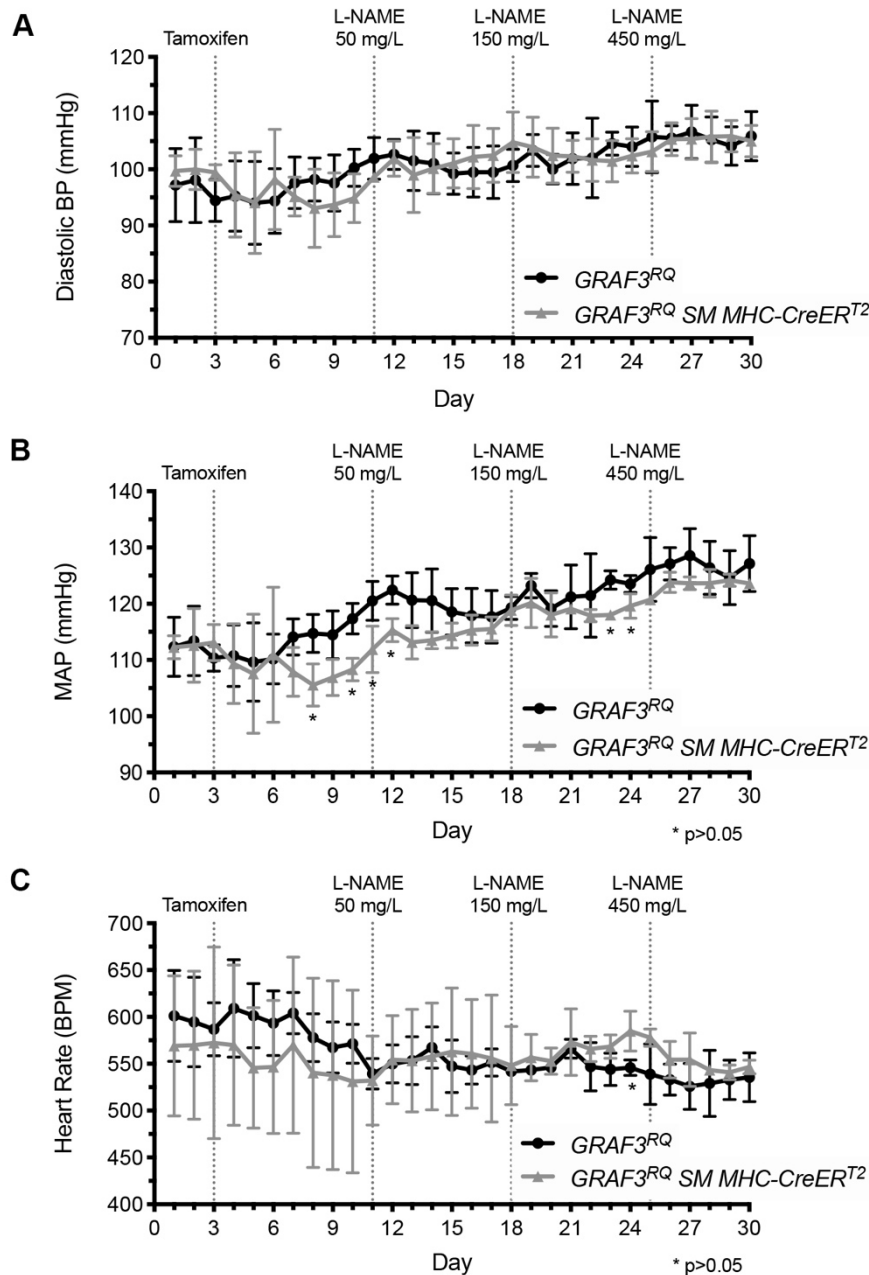

**Figure S1.** SMC-specific *GRAF3<sup>RQ</sup>* expression had insignificant impact on diastolic BP, MAP, or HR. Average 24hr (a) diastolic BP (b) MAP, and (c) HR measured via radio-telemetry, of unrestrained, conscious *GRAF3<sup>RQ</sup>* and *GRAF3<sup>RQ</sup> SM MHC-CreERT<sup>2</sup>* mice after tamoxifen treatment (100mg/kg for 3 consecutive days) and increasing L-NAME doses (50mg/L, 150mg/L, or 450mg/L) given for a week (each) in drinking water. Data are expressed as mean  $\pm$  SD;  $n=4$  for *GRAF3<sup>RQ</sup>* mice and  $n=3$  for *GRAF3<sup>RQ</sup> SM MHC-CreERT<sup>2</sup>*. \* $p > 0.05$  vs. *GRAF3<sup>RQ</sup>* (Student's t-test).

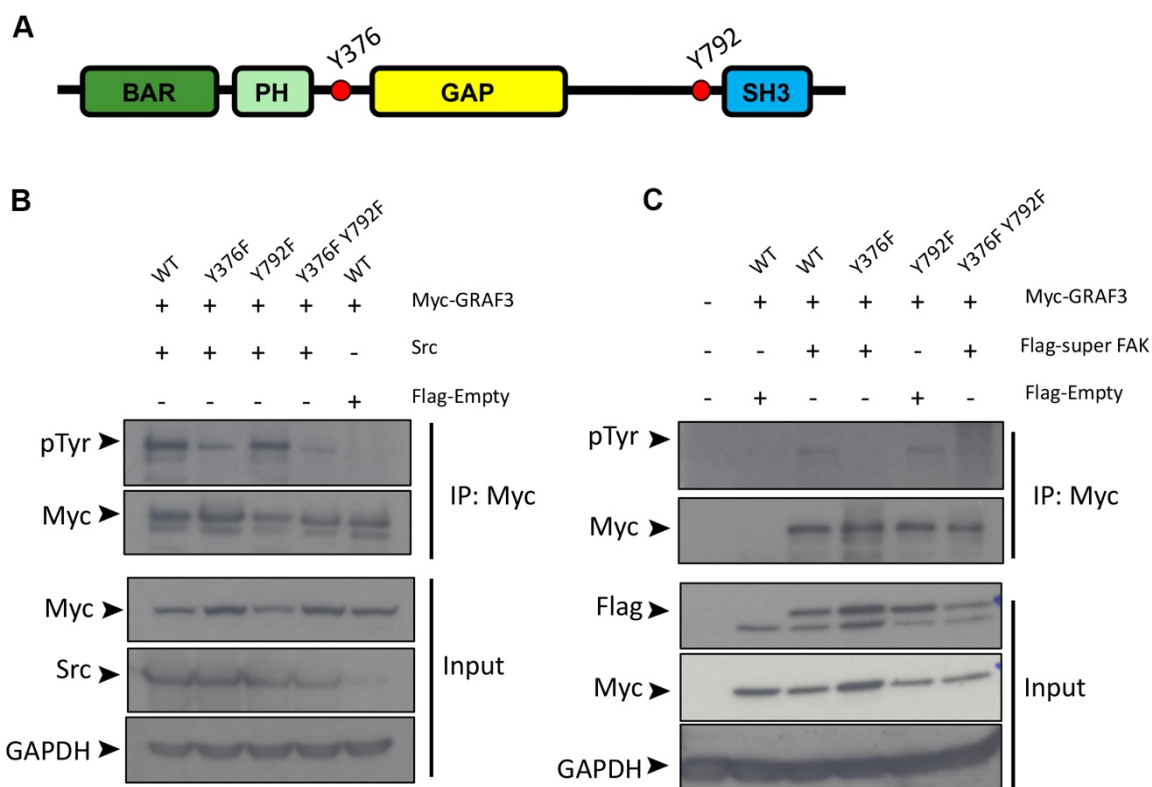

**Figure S2.** Y792 is not a major Src or FAK phosphorylation site. **(a)** Schematic of GRAF3 domain structure with indicated location of Y376 and Y792. Cos cells were transfected with the indicated GRAF3 variant and either **(b)** <sup>529</sup>Fsrc or **(c)** superFAK. Myc-tagged GRAF3 was immunoprecipitated from cell lysate and probed for tyrosine phosphorylation.

24

25

26

27

28

29

**Video S1.** Predicted structure of the open (active) GRAF3 BAR-PH-GAP dimer. Color scheme follows: BAR 1 (dark purple), PH 1 (light purple), BAR 2 (dark green), PH 2 (light green), GAP 1 and 2 (yellow), arginine fingers (active site) (dark blue), RhoA docking sites (pink), C-terminus of PH domain (red), N-terminus of GAP domain (orange); residues in teal aids in visualizing rotation. Model was created using Pymol and the solved, similar structures of Appl1 (BAR-PH) and GRAF1 (GAP).

30

31
